# Supplementary material for: The Effect of miRNA-Modified Exosomes in Animal Models of Spinal Cord Injury: A meta-Analysis
Source: PubMed Central journal article supplement (PMC8770826; doi:10.3389/fbioe.2021.819651), 2022-01-06
Supplement: Image2.pdf [file Image2.pdf]

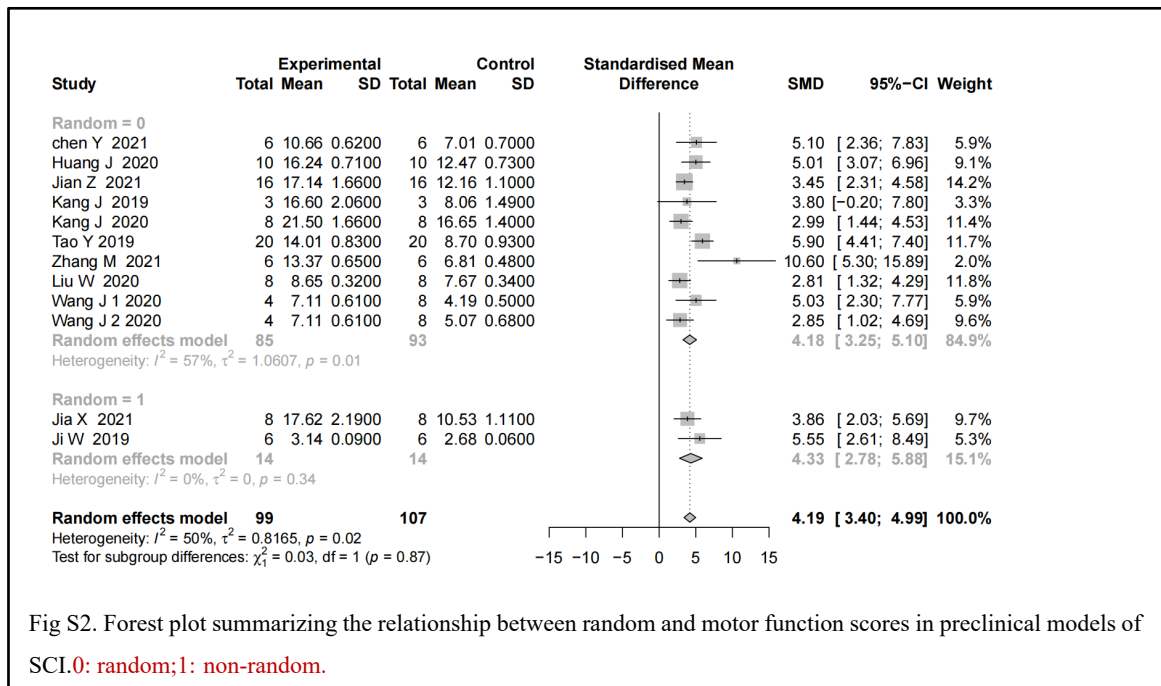

Fig S2. Forest plot summarizing the relationship between random and motor function scores in preclinical models of SCI.0: random;1: non-random.
