# Supplementary material for: The Effect of miRNA-Modified Exosomes in Animal Models of Spinal Cord Injury: A meta-Analysis
Source: PubMed Central journal article supplement (PMC8770826; doi:10.3389/fbioe.2021.819651), 2022-01-06
Supplement: Image3.pdf [file Image3.pdf]

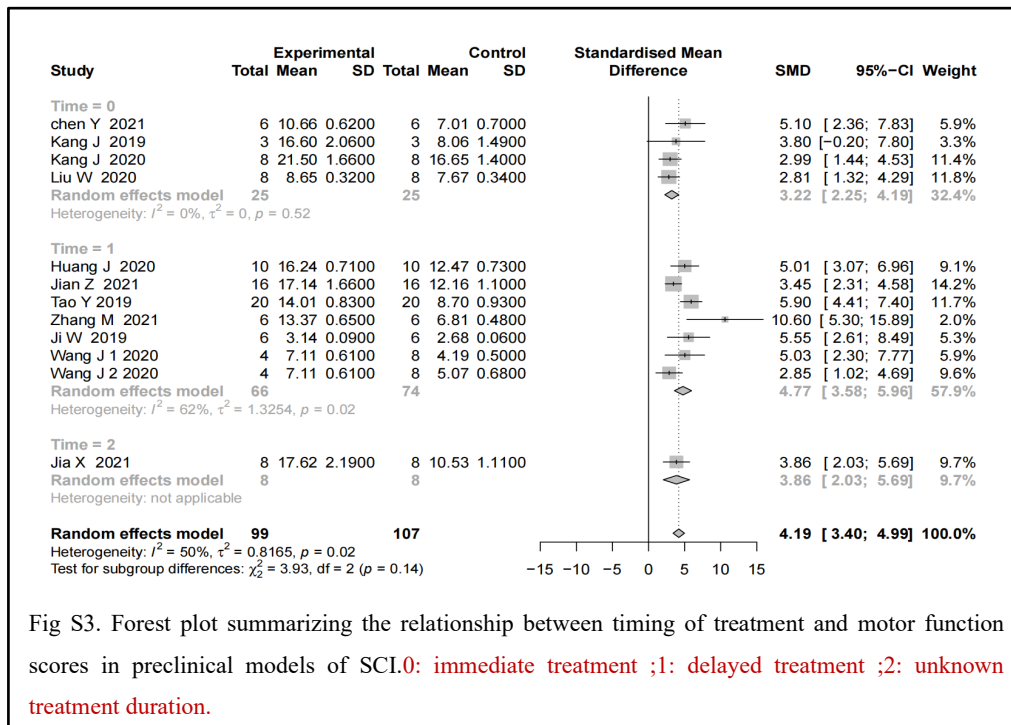

Fig S3. Forest plot summarizing the relationship between timing of treatment and motor function scores in preclinical models of SCI. 0: immediate treatment ;1: delayed treatment ;2: unknown treatment duration.
