# Supplementary material for: The Effect of miRNA-Modified Exosomes in Animal Models of Spinal Cord Injury: A meta-Analysis
Source: PubMed Central journal article supplement (PMC8770826; doi:10.3389/fbioe.2021.819651), 2022-01-06
Supplement: Image4.pdf [file Image4.pdf]

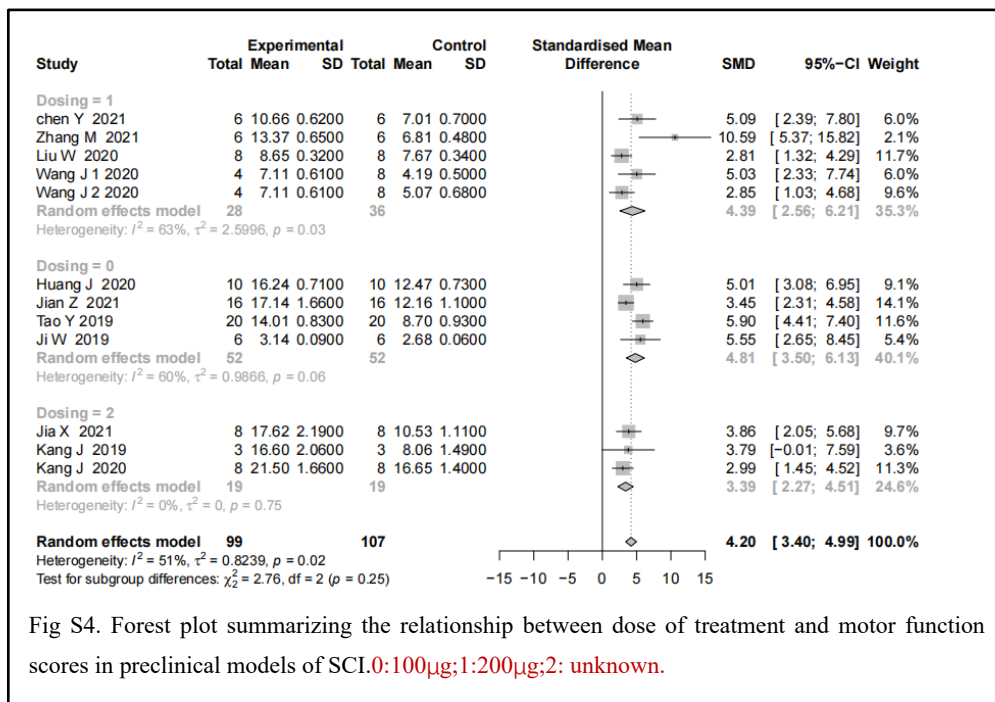

Fig S4. Forest plot summarizing the relationship between dose of treatment and motor function scores in preclinical models of SCI. 0:100 $\mu$ g; 1:200 $\mu$ g; 2: unknown.
